35

## 36 INTRODUCTION

37 mTOR exists as the mTOR-mLST8-Raptor complex (mTORC1) and mTOR-mLST8-Rictor  
38 complex (mTORC2). It serves as a multifunctional kinase in embryonic development, cancer,  
39 diabetes, aging, and neurodegenerative diseases (Bockaert and Marin, 2015; Laplante and  
40 Sabatini, 2012; Stallone et al., 2019). Its role and regulation in nervous system physiology and  
41 disease, however, is poorly understood (Hoeffler and Klann, 2010). This represents a major  
42 knowledge gap because the malfunction of mTORC1 activity (either by being too high or too low)  
43 has been linked to a variety of brain dysfunctions such as epilepsy, mental retardation, tuberous  
44 sclerosis, Huntington disease (HD), Parkinson's disease (PD), and Alzheimer's disease (AD), all  
45 of which affect a specific set of neuronal populations in the brain (Caccamo et al., 2014;  
46 Malagelada et al., 2010; Ravikumar et al., 2004; Troca-Marin et al., 2012; Zeng et al., 2009). A  
47 detailed understanding of how mTOR is regulated and what role it plays in selective brain regions  
48 is important for the development of better intervention strategies.

49 The brain's striatum is composed of more than 95% inhibitory medium spiny neurons  
50 (MSNs) and it plays an important role in motor, cognitive, psychiatric, and reward behaviors  
51 (Grahn et al., 2008). MSNs dysfunctions can lead to the motor abnormalities seen in HD and PD;  
52 however, the molecular mechanisms are unclear. Interestingly, global blocking of mTORC1  
53 signaling with rapamycin affords protection against the pathological and behavioral symptoms  
54 associated with HD and PD in murine models (Crews et al., 2010; Dehay et al., 2010; Fox et al.,  
55 2010; Malagelada et al., 2010; Ravikumar et al., 2004; Sarkar et al., 2008). However, the striatal-  
56 specific roles of mTOR signaling remains obscure.

57 Two major types of functionally distinct MSN are recognized, based on the dopamine 1  
58 receptor (D1R) or dopamine 2 receptor (D2R) expression found in the striatum. In association  
59 with other receptors (e.g., glutamate, serotonin, and adenosine A1 and A2A receptors), dopamine  
60 receptors play critical roles in the processing of sensory, motor, cognitive, and motivational  
61 functions. (Graybiel and Grafton, 2015; Rolls, 1994). Functionally, D1R signaling increases  
62 G $\alpha$ olf/adenylyl cyclase/cAMP/PKA signaling in the direct pathway of the basal ganglia, whereas  
63 D2R signaling inhibits cAMP/PKA signaling in the indirect pathway (Fernandez-Duenas et al.,  
64 2019; Herve, 2011; Kuroiwa et al., 2012; Nishi et al., 2011). Both dopamine D1 and D2 receptor  
65 stimulation promote motor activity. Pharmacological inhibition either of D1R or the D2R  
66 consistently trigger severe motor deficit and extrapyramidal side effects (EPS) (Klemm, 1989).

67 Recent studies have indicated that coordinated signaling of both D1R and D2R is  
68 responsible for the initiation and execution of motor activity (Sheng et al., 2019). Importantly,

69 mTOR phosphorylation is selectively increased in the striatum during L-DOPA-induced dyskinesia  
70 (Eshraghi et al., 2020) and motor learning (Bergeron et al., 2014). However, the genetic evidence  
71 for the physiological role of mTOR signaling in the striatum (or its role in D1R versus D2R MSNs  
72 signaling) is currently unknown. Using genetic and pharmacological approaches, we investigated  
73 the role of mTOR on striatal-mediated motor behaviors under basal and challenged conditions.  
74

## 75 **RESULTS**

### 76 **Striatal mTOR regulates motor behaviors**

77 The role of mTOR signaling in the regulation of striatal motor functions under basal conditions  
78 remains unclear. To address this question, we carried out conditional depletion of *mTOR* in the  
79 striatum of adult *mTOR<sup>flox/flox</sup>* mice. We used an AAV1.hSyn.HI.WPRE.SV40 variant expressing  
80 Cre-GFP (AAV-Cre-GFP) under the control of human synapsin promoter to deplete *mTOR*  
81 preferentially in striatal neuronal cells (Kugler et al., 2003). We stereotaxically injected purified  
82 virus (AAV-Cre-GFP or AAV-GFP) bilaterally into the striatum of 8-week-old *mTOR<sup>flox/flox</sup>* mice (Fig.  
83 1A, B). Using Ctip2 (a marker for MSNs), we confirmed that in AAV-Cre-GFP-injected *mTOR<sup>flox/flox</sup>*  
84 mice (*mTOR* mutant), mTOR is depleted in the striatum 18 weeks after Cre injection, as expected,  
85 but not in AAV-GFP-injected *mTOR<sup>flox/flox</sup>* mice (control) (Fig. 1C, D, E). To determine the potential  
86 influence of neuronal *mTOR* depletion on cell survival, we estimated the number of cells and  
87 ventricular size between *mTOR* mutant and control mice. We found no gross changes in the  
88 number of total cells (Fig. 1E) or the ventricular size of the rostral and caudal striatal regions  
89 between *mTOR* mutant and control mice (Fig. 1F, G). These results indicate that AAV-Cre-GFP  
90 injection produces *mTOR* depletion in the MSNs and does not elicit any neurodegenerative-like  
91 phenotype.

92 We next assessed the striatal motor functions in *mTOR* mutant and control mice two  
93 weeks after AAV-Cre-GFP or AAV-GFP control injections. As Cre-recombinase injection in the  
94 brain may affect behaviors (Rezai Amin et al., 2019), we have included an additional control group  
95 for Cre: WT [C57BL/6] mice injected with AAV-Cre-GFP (Cre-control) or AAV-GFP (GFP-control)  
96 in all of our longitudinal behavioral analyses.

97 First, we measured locomotor activity using the open-field test (OFT). In the OFT,  
98 *mTOR* mutant, control, and Cre/GFP-control mice are placed individually in faintly lit open field  
99 chambers for 30 min sessions. The *mTOR* mutant mice displayed a mild increase in forward  
100 locomotion at 14 weeks that was not significantly different at 10 or 18 weeks of age, compared to  
101 Cre/GFP injected control animals (Fig. 1H).

102           Second, we investigated whether depletion of striatal mTOR impacts on balance and  
103 motor coordination, which is regulated by the striatum-cerebellar circuitry, using rotarod(Bostan  
104 and Strick, 2018). The *mTOR* mutant showed a decreased trend of motor coordination on the  
105 rotarod test compared to the control and Cre/GFP-control groups (Fig. 1I).

106           Overall, these results indicate that striatal mTOR plays a modulatory role in locomotion  
107 and motor coordination under basal conditions.

108

### 109 **Striatal mTOR does not influence D1R-mediated motor effects**

110 Dopamine regulates motor functions such as locomotion and motor coordination by stimulating  
111 two main classes of receptors in the striatum (D1R and D2R) (Durieux et al., 2012). Considering  
112 that striatal mTOR depletion produces motor alterations under basal conditions, we questioned  
113 to what extent the D1R signaling-mediated function is affected in *mTOR* mutant mice. To address  
114 this question, we intraperitoneally (i.p.) injected pharmacological modulators that either activate  
115 D1R-signaling using SKF81297 (2.5 mg/kg, i.p.) or inhibit D1R-signaling using SCH23390 (0.1  
116 mg/kg, i.p.), as described in previous studies (Ghiglieri et al., 2015; Napolitano et al., 2010; Usiello  
117 et al., 2000; Vitucci et al., 2016). Injection of SKF81297 (2.5 mg/kg, i.p.), a selective agonist of  
118 the D1R receptor, produced robust motor stimulation in all animals compared to the saline-  
119 administered group. Thus, administration of the D1R agonist induced comparable  
120 hyperlocomotion in AAV-Cre-GFP-injected *mTOR*<sup>fllox/fllox</sup> and control groups (*mTOR*<sup>fllox/fllox</sup> injected  
121 with AAV-GFP or WT mice injected with AAV-Cre-GFP or AAV-GFP) when tested at 30 and 60  
122 min (Fig. 1J). This result indicates that mTOR depletion does not grossly interfere with D1R-  
123 mediated motor stimulation.

124           We next asked whether striatal mTOR plays any role in D1R-mediated catalepsy.  
125 Indeed, it has been well-established that blocking D1R with its antagonist SCH23390 (0.1 mg/kg,  
126 i.p.) elicits cataleptic behavior (i.e., the animal was unable to correct an externally imposed  
127 posture—time spent on the bar) (Morelli and Di Chiara, 1985; Napolitano et al., 2019). Notably,  
128 SCH23390 administration induced a similar cataleptic response in *mTOR* mutant mice and control  
129 groups (Fig. 1K, L). This result indicates that mTOR depletion has no significant effect on D1R  
130 antagonist-induced EPS.

131           Collectively, this data indicates that striatal mTOR does not affect pharmacologically  
132 modulated D1R-dependent motor behaviors.

133

### 134 **Striatal mTOR promotes D2R inhibition (Haloperidol)-induced cataleptic behavior**

135 We then investigated whether mTOR depletion modulates pre-and post-synaptic D2R-signaling-  
136 mediated motor behavior. We administered quinpirole (0.5 mg/kg, i.p.), a D2R agonist, that by  
137 activating the presynaptic D2R reduces dopamine concentration in the striatum and in turn exerts  
138 overall dopamine receptor hypo-stimulation coupled to motor depression in mice(Napolitano et  
139 al., 2010; Radl et al., 2018; Usiello et al., 2000). Interestingly, we found that regardless of  
140 genotype, the administration of quinpirole similarly inhibited motor exploration in a novel  
141 environment (Fig. 2A). This data indicates that a lack of mTOR does not affect normal presynaptic  
142 D2R receptor-dependent motor effects in animals.

143 Administration of a typical antipsychotic drug (haloperidol (0.5 mg/kg, i.p.), which  
144 inhibits post-synaptic D2R (Centonze et al., 2004; Radl et al., 2018; Sebel et al., 2017), robustly  
145 induced catalepsy in the control groups (Fig. 2B, C). Conversely, haloperidol administration  
146 completely failed to induce any cataleptic effect in *mTOR* mutant mice (Fig. 2B, C). Thus, a striking  
147 and complete loss of haloperidol-induced extrapyramidal symptoms was observed in the *mTOR*  
148 mutant mice (Fig. 2B, C). These results indicate that *mTOR* depletion interrupts the haloperidol-  
149 induced cataleptic effect, suggesting that mTOR signaling selectively controls post-synaptic D2R  
150 signaling in the striatal MSNs.

151

### 152 **mTOR mediates haloperidol-induced pS6 phosphorylation in the striatum**

153 Because haloperidol-induced catalepsy is completely abolished in the *mTOR* mutant mice, we  
154 hypothesized that haloperidol might promote mTOR signaling in the striatum. We administered  
155 haloperidol to *mTOR* mutant mice and the control group and isolated striatal tissue after 20 min.  
156 We found a clear upregulation of pS6 (S235/236) by haloperidol only in the AAV-GFP control  
157 group but not in the *mTOR* mutant mice (Fig. 2D, E). Surprisingly, haloperidol did not induce the  
158 phosphorylation of S6K or the 4EBP1, which are the direct mTORC1 targets. This data is  
159 consistent with a previous report(Valjent et al., 2011). Although the reasons for this are unclear,  
160 it was proposed that the basal S6K activity may be sufficient to induce pS6 because deletion of  
161 S6K abolishes haloperidol-induced pS6 in the striatum(Bonito-Oliva et al., 2013).  
162 Phosphoinositide-3 kinase target pAkt (T308) signaling or mTORC2 target pAkt (S473) was also  
163 unaltered in the striatum of the treatment and control groups (Fig. 2D, E).

164 It is well known that by blocking D2R, haloperidol unmasks the ability of adenosine  
165 A2AR to enhance striatal cAMP/PKA signaling and ultimately increases the phosphorylation  
166 levels of the glutamate receptor subunit GluR1 [pGluR1 (S845)] (Ghiglieri et al., 2015; Valjent et  
167 al., 2011). Interestingly, we found that haloperidol robustly induced pGluR1 (S845) in all  
168 genotypes and that the extent of activation was similar between *mTOR* mutant and control

169 animals (Fig. 2D, E). Thus, mTOR does not mediate haloperidol-induced pGluR1 signaling in the  
170 striatum.

171 As A2AR and D2R knockout mice showed diminished haloperidol-induced catalepsy  
172 (Boulay et al., 2000; El Yacoubi et al., 2001) and because haloperidol acts by blocking of D2R,  
173 we wanted to confirm that striatal expression of these receptors was comparable in the *mTOR*  
174 mutant mice and control mice. We found similar A2AR levels (but significantly enhanced D2R  
175 levels) in the striatum of the *mTOR* mutant mice compared to the control (Supplementary Figure  
176 1). Thus, diminished haloperidol-induced catalepsy is not due to diminished A2AR or D2R levels  
177 in the *mTOR* mutant mice.

178

### 179 **Pharmacological inhibition of mTOR abolishes haloperidol-induced catalepsy**

180 As striatal genetic depletion of mTOR completely abolished the haloperidol-induced catalepsy,  
181 we next asked whether pharmacological inhibition of mTOR would produce a similar phenotype.  
182 To investigate this, we treated 4-month-old C57BL/6 WT mice with mTORC1 inhibitor rapamycin  
183 (5.0 mg/kg., i.p.) for 20 minutes, followed by injection with haloperidol (0.5 mg/kg, i.p.). Haloperidol  
184 promoted a time-dependent cataleptic behavioral response in the vehicle-injected C57BL/6 mice,  
185 as well as in the rapamycin pretreated C57BL/6 WT mice (Fig. 2F). As expected, rapamycin  
186 treatment alone did not elicit a catalepsy response (Fig. 2F). This result indicates that 20 min of  
187 pretreatment with rapamycin does not affect the haloperidol-induced cataleptic response.

188 Interestingly, although the onset of the cataleptic behavioral response was similar  
189 between the groups, there was a trend towards decreased cataleptic behavior in the rapamycin  
190 pretreated animals after 60 and 90 min post haloperidol administration (Fig. 2F, arrow). This  
191 observation prompted us to hypothesize that rapamycin may interfere with a cataleptic response  
192 after 60 min or longer duration following administration. To investigate this hypothesis, we  
193 pretreated C57BL/6 WT mice with rapamycin (5.0 mg/kg., i.p.) for 3 hours before administering  
194 haloperidol (0.5 mg/kg, i.p.). Strikingly, we found a dramatic attenuation of haloperidol-induced  
195 catalepsy in animals that were pretreated with rapamycin for 3 hours (as compared to vehicle-  
196 treated groups) (Fig. 2G, H). This result indicates that a more prolonged exposure to rapamycin  
197 [which may be necessary for target (mTOR) engagement] is a prerequisite to block the  
198 haloperidol-induced cataleptic response in mice.

199

### 200 **Pharmacological inhibition of mTOR diminishes haloperidol-induced pS6 but not pGluR1**

201 Next, we investigated how rapamycin pretreatment impacted on haloperidol-induced striatal  
202 signaling in C57BL/6 WT mice. Compared to the vehicle, we found that haloperidol (for 20 min)

203 robustly induced striatal pS6 (S235/236) and pGluR1 (S845) signaling in C57BL/6 WT mice (Fig.  
204 2I, J). Haloperidol did not induce p4EBP1 (T37/46) in C57BL/6 WT mice, consistent with genetic  
205 model (Fig. 2D, E). However, a slight but significant increase of pS6K (T389) (Fig. 2I, J) was  
206 observed in haloperidol-injected C57BL/6 WT mice. Rapamycin pretreatment suppressed the  
207 haloperidol-induced pS6K and pS6 as well as diminished the basal pS6K, pS6, and p4EBP1.  
208 Rapamycin did not interfere with pGluR1 signaling, in the striatum (Fig. 2I, J), consistent with the  
209 observation in genetic model (Fig. 2D, E). These results indicate that pharmacological blocking  
210 of mTORC1 by rapamycin prevents the haloperidol-mediated mTORC1 signaling and associated  
211 catalepsy in the striatum.

212

## 213 **DISCUSSION**

214 The data presented here indicate that mTOR signaling in the striatum mediates post-synaptic  
215 D2R-mediated functions, as both genetic depletion of mTOR or pharmacological inhibition of  
216 mTORC1 signaling by rapamycin prevented a haloperidol-induced catalepsy response (Fig. 2K).  
217 Importantly, mTOR regulates specific signaling and behavioral functions in the striatum. The D1R-  
218 mediated motor behaviors and the presynaptic D2R signaling are unaffected by the loss of striatal  
219 mTOR. Our data represent, to the best of our knowledge, the first report to use rapamycin to  
220 assess the role of mTOR signaling in haloperidol-induced catalepsy.

221 Previous studies showed that haloperidol induces pS6 signaling by enhancement of  
222 adenosine A2A/Golf signaling; however, the functional relevance of this pathway and its role in  
223 cataleptic behaviors were unknown (Bowling et al., 2014; Valjent et al., 2011). PKA signaling that  
224 induces pGluR1 is particularly linked to the generation of haloperidol-induced catalepsy. (Adams  
225 et al., 1997; Roche et al., 1996). Studies in non-neuronal cells showed that PKA acts upstream  
226 of mTOR and can activate or inhibit it (de Jossineau et al., 2014; Jewell et al., 2019; Kim et al.,  
227 2010). PKA can directly phosphorylate mTOR and promote the phosphorylation of S6K in adipose  
228 tissue. (Liu et al., 2016). Indeed, it has been demonstrated that PKA activation induces pS6 in  
229 cultured striatal neurons (Valjent et al., 2011). With rapamycin or mTOR depletion, we found that  
230 mTOR signaling in the striatum did not interfere with haloperidol-induced pGluR1 signaling;  
231 however, it altogether abolished haloperidol-induced catalepsy. Thus, our data indicate that  
232 mTOR signaling in the striatum promotes haloperidol-induced catalepsy by acting downstream or  
233 independently of PKA-pGluR1 signaling.

234 The results presented here clearly suggest that an acute pretreatment of rapamycin  
235 completely reverses haloperidol-induced catalepsy, further emphasizing the critical role of  
236 mTORC1 in altering D2R signaling to promote extrapyramidal symptoms. Note that short-term

237 (20 min) pretreatment with rapamycin had a negligible effect. However, long-term rapamycin  
238 pretreatment (3 hours) abolished haloperidol-induced catalepsy. One possibility for such delayed  
239 action is due to the relatively poor brain penetrability of rapamycin and thus a delayed target  
240 engagement (Brandt et al., 2018). Interestingly, a previous study indicated Fyn kinase had a role  
241 in the regulation of haloperidol-induced catalepsy (Hattori et al., 2006). Fyn kinase also promotes  
242 mTORC1 signaling and it is therefore tempting to speculate that Fyn-mTORC1 signaling may  
243 have a role in haloperidol-mediated catalepsy (Hattori et al., 2006; Wang et al., 2015).

244 What are the molecular mechanisms underlying haloperidol–mTORC1–cataleptic  
245 behavior? A previous study indicated that haloperidol induced the mTOR-dependent translation  
246 and neuronal morphology in cultured MSNs (Bowling and Santini, 2016). In vivo, haloperidol can  
247 increase or decrease MSN morphology (spine density); in particular, it can decrease the spine  
248 density in D2 MSN (Sebel et al., 2017). Therefore, it is conceivable that mTOR is a critical  
249 regulator of haloperidol-induced molecular changes in the striatum. In addition to protein  
250 synthesis, mTOR signaling also regulates autophagy, purine, and lipid biosynthesis (Ben-Sahra  
251 and Manning, 2017). Based on our study, it is possible that mTOR signaling may translate the  
252 haloperidol-induced signaling into catalepsy by more than one pathway. Further research on the  
253 importance of these mechanistic insights, by dissecting the cell-type-specific role of mTOR,  
254 identification of haloperidol-induced mTOR interactors, and high-throughput comparative  
255 proteomic analysis in mTOR mutant and WT mice, could help unravel D2R-specific mechanisms  
256 of mTOR signaling in extrapyramidal symptoms.

257 Haloperidol is a major antipsychotic medication prescribed to diminish psychosis in  
258 schizophrenia patients (Ostinelli et al., 2017). However, its action is limited due to its elicitation of  
259 Parkinsonian-like bradykinesia, which affects a majority of patients and is commonly called  
260 haloperidol-induced EPS (Finucane et al., 2020; Kurz et al., 1995). To date, there are no effective  
261 treatments available for haloperidol-induced EPS. By combining genetic and pharmacological  
262 approaches, our mechanistic models provide a clear insight into the causal role of mTOR  
263 signaling in promoting haloperidol-induced catalepsy in preclinical murine systems (Fig. 2K). Our  
264 study therefore illustrates the translational potential of rapamycin in alleviating striatal D2R-  
265 mediated EPS in humans.

266  
267

268 **Author contributions:** S.Su conceptualized the project. UNRJ designed and carried out all the  
269 work in *mTOR*<sup>flox/flox</sup> and related control mice. A.U directed, and N.S co-designed, pharmacological  
270 experiments with UNRJ. W.P performed preliminary behavioral analysis. S.Su wrote the paper



271 with input from the co-authors.

272 **Acknowledgments:** We would like to thank Melissa Benilous for her administrative help and the  
273 members of the lab for their continuous support and collaborative atmosphere. This research was  
274 supported by funding from National Institutes of Health/National Institute of Neurological  
275 Disorders and Stroke grant R01-NS087019-01A1, National Institutes of Health/National Institute  
276 of Neurological Disorders and Stroke grant R01-NS094577-01A1 and a grant from Cure  
277 Huntington Disease Initiative (CHDI) foundation.

278

279 Disclosure Statement: The authors have no conflicts of interest to disclose.

280

## 281 **FIGURE LEGENDS**

282

283 **Figure 1. Effect of striatal mTOR depletion on motor behaviors.** (A) Schematic representation  
284 of the AAV-Cre-GFP or AAV-GFP injected sites at the indicated coordinates targeting dorsal side  
285 of mice striatum. (B) Representative section showing the DAPI (blue) injection in the striatum  
286 using the coordinates in A. (C) Confocal images of the striatal brain sections from the  $mTOR^{flox/flox}$   
287 mice injected with AAV-Cre-GFP or AAV-GFP, showing GFP or GFP-Cre (green) expression,  
288 mTOR (blue), and Ctip2 (red) immunohistochemistry, and nuclear stain, DAPI (cyan). (D) High  
289 magnification of confocal images in C, showing that in AAV-GFP injected  $mTOR^{flox/flox}$  mice, Ctip2-  
290 positive medium spiny neurons (MSNs) show GFP expression and mTOR immunostaining (yellow  
291 arrows). In AAV-Cre-GFP injected  $mTOR^{flox/flox}$  mice, Ctip2 positive MSNs express GFP (cre) but  
292 are negative for mTOR immunostaining (white arrows). Some Ctip2 positive MSN negative for  
293 GFP (cre) are positive for mTOR staining (pink arrow). (E) Quantification for total number of cells  
294 identified by DAPI staining, % of mTOR, Ctip2 and GFP triple-positive neurons and % of mTOR  
295 and GFP double-positive neurons in striatum of the  $mTOR^{flox/flox}$  mice injected with AAV-Cre-GFP  
296 or AAV-GFP. Images are representative of five ROIs from 4-5 sections per animal (n= 4 mice per  
297 group). Percentages were determined by considering the number of DAPI stained nuclei as 100%.  
298 All values are mean  $\pm$  SEM. n.s. not significant, \*\*\*P < 0.001, two-tailed Student's *t*-test. (F)  
299 Representative hematoxylin/eosin-stained sections for rostral (+1.1 from bregma) and caudal  
300 (+0.5 from bregma) ventriculus in  $mTOR^{flox/flox}$  mice injected with AAV-Cre-GFP or AAV-GFP. (G)  
301 Quantification of ventricular area from F. n.s. not significant, two-way ANOVA, Bonferroni post-  
302 hoc test (four caudal and four rostral sections were quantified for four mice per group). (H, I) Total  
303 distance (cm) at the indicated time points in open-field test (OFT) (H) and latency to fall (sec) in

304 rotarod test (I) for the  $mTOR^{fox/fox}$  injected with AAV-GFP (n=13, female =10, male =3), AAV-Cre-  
305 GFP (n=13, female =6, male =7) or WT mice injected with AAV-GFP or AAV-Cre-GFP (n=11,  
306 female =5, male =6) at 10, 14 and 18 weeks of age. Data are mean  $\pm$  SEM. \*\*P < 0.01, \*\*\*P <  
307 0.001, repeated measures two-way ANOVA followed by Bonferroni post-hoc test. (J) D1R  
308 agonist (SKF81297, 2.5 mg/Kg, i.p.)-induced activity in OFT in AAV-Cre-GFP or AAV-GFP  
309 injected  $mTOR^{fox/fox}$  and AAV-Cre-GFP/GFP injected WT mice. Bar graphs indicates % of change  
310 in total activity after habituation. Data are mean  $\pm$  SEM, n = 11-13 per group, \*P<0.05, \*\*P < 0.01,  
311 \*\*\*P < 0.001, repeated measures two-way ANOVA followed by Bonferroni post-hoc test. (K)  
312 Quantification of the catalepsy (time on the bar, sec)-induced by D1R antagonist SCH23390 (0.1  
313 mg/Kg, i.p.) in indicated mice groups. Data are mean  $\pm$  SEM, n = 11-13 per group, repeated  
314 measures two-way ANOVA followed by Bonferroni post-hoc test. (L) Representative image of  
315 catalepsy in AAV-Cre-GFP or AAV-GFP injected  $mTOR^{fox/fox}$  mice treated with SCH23390.

316

317 **Figure 2. mTOR depletion abolishes D2R antagonist haloperidol-induced catalepsy. (A)**

318 D2R agonist quinpirole (0.5 mg/Kg, i.p.)-induced open field activity, in AAV-Cre-GFP or AAV-GFP  
319 injected  $mTOR^{fox/fox}$  mice and WT control mice. Data are mean  $\pm$  SEM, n = 11-13 per group,  
320 repeated measures two-way ANOVA followed by Bonferroni post-hoc test. (B) Catalepsy (as  
321 measured by time on the bar)-induced by D2R antagonist haloperidol (0.5 mg/Kg, i.p.) in AAV-  
322 Cre-GFP or AAV-GFP injected  $mTOR^{fox/fox}$  and WT control mice. Data are mean  $\pm$  SEM, n = 11-  
323 13 per group, \*P<0.05, \*\*P < 0.01, \*\*\*P < 0.001, repeated measures two-way ANOVA followed  
324 by Bonferroni post-hoc test. (C) Representative image of AAV-Cre-GFP or AAV-GFP injected  
325  $mTOR^{fox/fox}$  mice treated with haloperidol. (D) Western blot analysis of indicated proteins from  
326 striatum of indicated mice after 20 minutes of haloperidol (0.5 mg/Kg, i.p.) or saline injection. (E)  
327 Bar graph indicates quantification of the indicated proteins from C. Data are mean  $\pm$  SEM, n = 4-  
328 5 per group, \*P<0.05, \*\*P<0.01, \*\*\*P< 0.001, two-way ANOVA, Bonferroni post-hoc test. (F, G)  
329 Quantification of catalepsy induced by D2R antagonist haloperidol (0.5 mg/Kg, i.p.) in vehicle or  
330 pretreated with rapamycin (5 mg/Kg, i.p.) for 20 minutes (F) or 3 hours (G) in C57BL/6 WT mice.  
331 Data are mean  $\pm$  SEM, n = 5 per group, \*\*\*P< 0.001. Repeated measures two-way ANOVA,  
332 Bonferroni post-hoc test. (H) Representative image of haloperidol induced catalepsy in WT mice  
333 pretreated with rapamycin or vehicle. (I, J) Western blot analysis (I) and quantification (J) of  
334 indicated targets from the striatal tissue after 20 minutes of haloperidol and rapamycin  
335 pretreatment (3 hours). Data are mean  $\pm$  SEM, n = 5 per group, \*P<0.05, \*\*P<0.01, \*\*\*P< 0.001.  
336 two-way ANOVA, Bonferroni post-hoc test. (K) Model shows mTOR mediates D2R inhibitory  
337 signals to induce catalepsy linked to extrapyramidal side effects in humans.

338

339 **Supplementary Figure 1. A2AR and D2R expression in *mTOR* mutant mice. (A)** Western blot  
340 analysis of indicated proteins from striatum of AAV-GFP and AAV-Cre-GFP injected *mTOR*<sup>fllox/fllox</sup>  
341 mice. **(B)** Bar graph indicates quantification of the indicated proteins from A. Data are mean ±  
342 SEM, n = 4-5 per group, \*\*\*P< 0.001. two-way ANOVA, Bonferroni post-hoc test.

343

## 344 **MATERIALS AND METHODS**

### 345 **Chemicals and Antibodies**

346 The majority of the chemicals used were purchased from Sigma, unless mentioned otherwise.  
347 Antibodies against - mTOR (#2983) pS6K T389 (#9234), S6K (#9202), pS6 S235/236 (#4858),  
348 S6 (#2217), p4EBP1 T37/46 (#2855), 4EBP1 (#9644), pAkt S473 (#4060), pAkt T308 (#13038),  
349 and Akt (#4691) were from Cell Signaling Technology. Antibodies for actin (sc-47778), GFP (sc-  
350 33673), A2AR (sc-32261), and D2R (sc-5303) were from Santa-Cruz Biotechnology. Ctip2  
351 (ab18465) antibody was from Abcam. (+/-)-Quinpirole dihydrochloride, (Q111), Haloperidol  
352 (H1512), and R(+)-SCH-23390 hydrochloride (D054) were purchased from MilliporeSigma. SKF  
353 81297 hydrobromide was from R&D systems. Rapamycin was purchased from LC laboratories  
354 (R-5000). Haloperidol was initially dissolved in glacial acetic acid, then its pH was adjusted close  
355 to 7 with NaOH, and final dilution was made in saline solution (0.9 %). Rapamycin was dissolved  
356 in 5% dimethyl sulfoxide (DMSO), 15% PEG-400 (polyethylene glycol, molecular weight 400),  
357 and 5% Tween-20, and finally dissolved in saline solution for injection. SCH23390, SKF81297,  
358 and Quinpirole were dissolved in saline solution. All the drugs were administrated by  
359 intraperitoneally (i.p.) injection.

360

### 361 **Animals**

362 *mTOR*<sup>fllox/fllox</sup> mice that harbor *loxP* sites flanking exons 1-5 of the mTOR locus (The Jackson  
363 Laboratory, strain B6.129S4-*mTOR*<sup>tm1.2Koz/J</sup>, Stock No: 011009) and C57BL/6J (wild type, WT)  
364 were used for adeno-associated virus micro-injections. Mice were housed in groups of two or  
365 three on a 12:12 h light–dark cycle and were provided food and water ad libitum. All protocols  
366 were approved by Institutional Animal Care and Use Committee at The Scripps Research  
367 Institute, Florida,

368

### 369 **Stereotaxic surgeries**

370 For all surgical procedures, eight-week old mice were anesthetized through the constant delivery  
371 of isoflurane while mounted in a stereotaxic frame (David Kopf Instruments). AAV-Cre-GFP

372 (AAV1.hSyn.HI.eGFP-Cre.WPRE.SV40) or AAV-GFP (green fluorescent protein,  
373 AAV1.hSyn.eGFP.WPRE.bGH) (Vector Core, University of Pennsylvania) were injected  
374 bilaterally into the striatum at the following coordinates: ML =  $\pm$  1.6, AP = +1.1; DV = -3.9/-3.5  
375 and ML =  $\pm$  2.5; AP = +0.5; and DV = -4.2/-3.6 from bregma. Virus was injected in 0.5  $\mu$ l volumes  
376 ( $5.9 \times 10^{12}$  gc/mL) per injection site in each animal (4  $\mu$ l total). Animals recovered for two weeks  
377 before behavioral testing. The efficacy of the viral injections was determined by GFP expression  
378 in the striatum.

379

### 380 Behavioral Analysis

381 Longitudinal behavioral testing was performed for AAV-Cre-GFP or AAV-GFP-injected  
382 *mTOR<sup>flox/flox</sup>* mice, and wild type (WT) mice. All behavioral testing was performed as described in  
383 our previous work (Pryor et al., 2014; Swarnkar et al., 2015) during the light phase of the light-dark  
384 cycle between 8:00 am and 12:00 pm. For each week/month of behavioral testing, the following  
385 measures were assessed with the rotarod test on the first four days and an open-field test on the  
386 fifth. Rotarod testing was performed using a linear accelerating rotation paradigm (Med  
387 Associates Inc.) for three trials separated by 20 min for four consecutive days each month. The  
388 mice were placed on the apparatus at 4 rpm and were subjected to increasing rpm, accelerating  
389 to 40 rpm over the course of a maximum of five minutes. The overall latency to fall for each mouse  
390 was calculated as the average of the three trials across four days for each month. The latency of  
391 falling from the rod was scored as an index of motor coordination, while improvement in  
392 performance across training days, as measured by increasing latency to fall from the rotarod,  
393 indicates motor learning. Open-field activity was assessed in a single 30-minute session using  
394 EthoVision XT software (Noldus Information Technology). Each mouse was placed individually in  
395 the center of each square enclosure, and movement was quantified automatically. Single cohort  
396 of mice with mixed sex ratio were used for the behavior testing of AAV injected *mTOR<sup>flox/flox</sup>* mice:  
397 *mTOR<sup>flox/flox</sup>*-AAV-GFP (n = 13, male 3 and female 10) and *mTOR<sup>flox/flox</sup>*-AAV-Cre-GFP (n = 13,  
398 male 7 and female 6). Single cohort of mice were used for behavior testing of AAV injected WT  
399 mice: WT- AAV-GFP (n = 5, female 2, male 3) and WT- AAV-Cre-GFP (n = 6, female 3, male 3).  
400 As there were no differences in the behaviors of WT-GFP and WT-Cre-GFP injected mice, they  
401 were combined for the group analysis.

402

### 403 *Quinpirole and SKF81297 evaluation*

404 Pharmacological effect of D2R agonist Quinpirole and D1R agonist SKF81297 was made using  
405 the same Open-field system and the EthoVision XT software (Noldus Information Technology).

406 Each mouse was placed individually in the center of a plastic box (11x 14 inches) with fresh  
407 bedding. For SKF81297 evaluation, mice were placed in the boxes for 30 minutes, as basal  
408 activity and habituation, then the drug was injected (2.5 mg/Kg, i.p.) and the total activity was  
409 recorded for 90 minutes. Results were plotted in a bar-graph showing the % change in the total  
410 activity after habituation at 0, 30 and 60 minutes. For Quinpirole experiment, mice were placed in  
411 the center of the plastic box with fresh bedding after the drug injection (0.5 mg/Kg, i.p.), then the  
412 total distance traveled (cm) was measured each 5 min during the next 30 min. Before each  
413 protocol, animals were kept in a waiting room for at least 30 minutes. Each control group was  
414 treated with the vehicle according to the drug.

415

#### 416 *Haloperidol and SCH23390 evaluation*

417 Behavioral evaluation for D2R antagonist Haloperidol (0.5 mg/Kg, i.p.) and D1R antagonist  
418 SCH23390 (0.1 mg/Kg, i.p.) was made by measuring the catalepsy-induced effect using the bar  
419 test. Catalepsy was determinate placing each mouse with its forelegs on the bar in a kangaroo  
420 posture (Figure 1L and Figure 2C, H), latency to change the corporal posture was recorded for  
421 three trials, and average of them was used for group analysis. After drug injection mice were  
422 evaluated on the bar at 15, 30, 60, 90 for SCH23390, and at 0, 30, 60, 90, 120, 180, 240, 300,  
423 and 360 minutes for Haloperidol in the *mTOR*<sup>flox/flox</sup> and WT mice injected with AAV-GFP or AAV-  
424 Cre-GFP viruses. For Rapamycin and Haloperidol experiments in C57BL/6 WT mice, animals  
425 were injected with Rapamycin (5 mg/Kg) as pretreatment at 20 minutes or 3 hours before  
426 Haloperidol (0.5 mg/Kg). After Haloperidol injection mice were tested on the bar at 15, 30, 45, 60,  
427 90, and 120 minutes. Before each protocol, each mouse was kept in single cage in the procedure  
428 room for at least 30 minutes. Each control group was treated with the vehicle according to the  
429 drug.

430

#### 431 **Western blot analysis**

432 Twenty minutes after haloperidol injection, mice were euthanized by decapitation and brains were  
433 rapidly dissected and the striatum was quickly removed and snap-frozen in liquid nitrogen. Tissue  
434 was homogenized in RIPA buffer [50 mM Tris-HCl (pH 7.4), 150 mM NaCl, 1.0% Triton X-100,  
435 0.5% sodium deoxycholate, 0.1% SDS,) with a protease inhibitor cocktail (Roche, Sigma) and  
436 phosphatase inhibitors (PhosSTOP, Roche, Sigma). Protein concentration was measured using  
437 BCA protein assay reagent (Pierce). Protein lysates were loaded and separated by 4-12% Bis-  
438 Tris Gel (Invitrogen), transferred to PVDF membranes, and probed with the indicated antibodies.  
439 Secondary antibodies were HRP-conjugated (Jackson Immuno Research, Inc).

440 Chemiluminescence was detected using WesternBright Quantum (Advansta) ECL reagent using  
441 a chemiluminescence imager (Alpha Innotech). Western blotting experiment was carried out as  
442 described previously (Pryor et al., 2014; Shahani et al., 2017; Shahani et al., 2014; Shahani et al.,  
443 2016; Swarnkar et al., 2015). Relative levels of all the proteins were normalized to actin and  
444 quantified using Image J. Relative levels of phosphorylated proteins were normalized to  
445 respective normalized total proteins and quantified.

446

#### 447 **Immunohistochemistry and analysis**

448 Immunostaining was performed as previously described (Chen et al., 2015; Shahani et al., 2017;  
449 Swarnkar et al., 2015). Briefly, mouse brains were fixed in 4% paraformaldehyde for overnight,  
450 cryoprotected in a sucrose/PBS gradient at 4 °C (10, 20 and 30%), and embedded in Tissue-Tek  
451 OCT compound (Sakura). Coronal sections (20µm) were collected on Superfrost/Plus slides and  
452 immunostained after heat-induced antigen retrieval [10 min in boiling citrate buffer (pH 6.0),  
453 MilliporeSigma, C9999]. Primary antibodies used in this study were anti-Ctip2 (1:500, Abcam,  
454 ab18465), anti-mTOR (1:250, Cell Signaling, #2983), and anti-GFP (Santa Cruz, SC33673).  
455 Alexa Fluor 488, 594, and 647 conjugated secondary antibodies (Thermo Fisher Scientific) were  
456 used in this study. Immunofluorescent brain sections were counterstained with DAPI and mounted  
457 using Fluoromount-G mounting medium (Thermo Fisher Scientific). Images were obtained with  
458 the Zeiss LSM 880 microscope and processed using the ZEN software (Zeiss).

459

460 For cell quantification, five regions of interest (ROIs) of 100 µm<sup>2</sup> were defined in immunostained  
461 sections (four to five sections for each mouse, n= 4 mice per group) of the medial striatum from  
462 *mTOR<sup>flox/flox</sup>* injected with AAV-GFP or AAV-Cre viruses. Total number of cells were calculated by  
463 counting the DAPI stained nuclei. AAV-Infected neurons were identifying by expression of the  
464 GFP. GFP expression was observed in the soma of the AAV-GFP infected neurons while AAV-  
465 Cre infected neurons expressed GFP in the nucleus. Percentage of the Ctip2, mTOR and GFP  
466 triple-positive neurons were determined considering DAPI stained cells as 100%. Ventricular area  
467 was determinate in hematoxylin/eosin-stained sections, from the same animals, four rostral (+1.1  
468 from Bregma) and caudal (+0.5 from Bregma) sections from each animal (n=4 mice per group)  
469 were taken using the Leica DM5500B microscope. The ventricular area was calculated by  
470 analyzing the images using the ImageJ software.

471

#### 472 **Statistical Analysis**

473 Data are presented as mean  $\pm$  SEM as indicated. Statistical analysis was performed with a  
474 Student's t-test or two-way ANOVA followed by Bonferroni post-hoc test or repeated measure  
475 two-way ANOVA followed by Bonferroni post-hoc test as indicated in the figure legends. Repeated  
476 measures two-way analysis of variance (ANOVA) where time was the repeated measure and  
477 treatment/genotype group was the fixed effect. Post hoc Bonferroni multiple comparison tests  
478 were used to identify statistically significant differences between treatment/genotype groups at  
479 each time point. Significance was set at  $P < 0.05$ . All statistical tests were performed using Prism  
480 7.0 (GraphPad software).

481

## 482 REFERENCES:

- 483 Adams, M.R., Brandon, E.P., Chartoff, E.H., Idzerda, R.L., Dorsa, D.M., and McKnight, G.S.  
484 (1997). Loss of haloperidol induced gene expression and catalepsy in protein kinase A-  
485 deficient mice. *Proc Natl Acad Sci U S A* 94, 12157-12161.
- 486 Ben-Sahra, I., and Manning, B.D. (2017). mTORC1 signaling and the metabolic control of cell  
487 growth. *Curr Opin Cell Biol* 45, 72-82.
- 488 Bergeron, Y., Chagniel, L., Bureau, G., Massicotte, G., and Cyr, M. (2014). mTOR signaling  
489 contributes to motor skill learning in mice. *Front Mol Neurosci* 7, 26.
- 490 Bockaert, J., and Marin, P. (2015). mTOR in Brain Physiology and Pathologies. *Physiol Rev* 95,  
491 1157-1187.
- 492 Bonito-Oliva, A., Pallottino, S., Bertran-Gonzalez, J., Girault, J.A., Valjent, E., and Fisone, G.  
493 (2013). Haloperidol promotes mTORC1-dependent phosphorylation of ribosomal protein S6  
494 via dopamine- and cAMP-regulated phosphoprotein of 32 kDa and inhibition of protein  
495 phosphatase-1. *Neuropharmacology* 72, 197-203.
- 496 Bostan, A.C., and Strick, P.L. (2018). The basal ganglia and the cerebellum: nodes in an  
497 integrated network. *Nat Rev Neurosci* 19, 338-350.
- 498 Boulay, D., Depoortere, R., Oblin, A., Sanger, D.J., Schoemaker, H., and Perrault, G. (2000).  
499 Haloperidol-induced catalepsy is absent in dopamine D(2), but maintained in dopamine D(3)  
500 receptor knock-out mice. *Eur J Pharmacol* 391, 63-73.
- 501 Bowling, H., and Santini, E. (2016). Unlocking the molecular mechanisms of antipsychotics -  
502 a new frontier for discovery. *Swiss Med Wkly* 146, w14314.
- 503 Bowling, H., Zhang, G., Bhattacharya, A., Perez-Cuesta, L.M., Deinhardt, K., Hoeffler, C.A.,  
504 Neubert, T.A., Gan, W.B., Klann, E., and Chao, M.V. (2014). Antipsychotics activate mTORC1-  
505 dependent translation to enhance neuronal morphological complexity. *Sci Signal* 7, ra4.
- 506 Brandt, C., Hillmann, P., Noack, A., Romermann, K., Ohler, L.A., Rageot, D., Beaufils, F., Melone,  
507 A., Sele, A.M., Wymann, M.P., et al. (2018). The novel, catalytic mTORC1/2 inhibitor PQR620  
508 and the PI3K/mTORC1/2 inhibitor PQR530 effectively cross the blood-brain barrier and  
509 increase seizure threshold in a mouse model of chronic epilepsy. *Neuropharmacology* 140,  
510 107-120.
- 511 Caccamo, A., De Pinto, V., Messina, A., Branca, C., and Oddo, S. (2014). Genetic reduction of  
512 mammalian target of rapamycin ameliorates Alzheimer's disease-like cognitive and  
513 pathological deficits by restoring hippocampal gene expression signature. *J Neurosci* 34,  
514 7988-7998.

515 Centonze, D., Usiello, A., Costa, C., Picconi, B., Erbs, E., Bernardi, G., Borrelli, E., and Calabresi,  
516 P. (2004). Chronic haloperidol promotes corticostriatal long-term potentiation by targeting  
517 dopamine D2L receptors. *J Neurosci* 24, 8214-8222.

518 Chen, Y., Huang, W.C., Sejourne, J., Clipperton-Allen, A.E., and Page, D.T. (2015). Pten  
519 Mutations Alter Brain Growth Trajectory and Allocation of Cell Types through Elevated beta-  
520 Catenin Signaling. *J Neurosci* 35, 10252-10267.

521 Crews, L., Spencer, B., Desplats, P., Patrick, C., Paulino, A., Rockenstein, E., Hansen, L., Adame,  
522 A., Galasko, D., and Masliah, E. (2010). Selective molecular alterations in the autophagy  
523 pathway in patients with Lewy body disease and in models of alpha-synucleinopathy. *PLoS*  
524 *One* 5, e9313.

525 de Joussineau, C., Sahut-Barnola, I., Tissier, F., Dumontet, T., Drelon, C., Batische-Lignier, M.,  
526 Tauveron, I., Pointud, J.C., Lefrancois-Martinez, A.M., Stratakis, C.A., et al. (2014). mTOR  
527 pathway is activated by PKA in adrenocortical cells and participates in vivo to apoptosis  
528 resistance in primary pigmented nodular adrenocortical disease (PPNAD). *Hum Mol Genet*  
529 23, 5418-5428.

530 Dehay, B., Bove, J., Rodriguez-Muela, N., Perier, C., Recasens, A., Boya, P., and Vila, M. (2010).  
531 Pathogenic lysosomal depletion in Parkinson's disease. *J Neurosci* 30, 12535-12544.

532 Durieux, P.F., Schiffmann, S.N., and de Kerchove d'Exaerde, A. (2012). Differential regulation  
533 of motor control and response to dopaminergic drugs by D1R and D2R neurons in distinct  
534 dorsal striatum subregions. *EMBO J* 31, 640-653.

535 El Yacoubi, M., Ledent, C., Parmentier, M., Costentin, J., and Vaugeois, J.M. (2001). Adenosine  
536 A2A receptor knockout mice are partially protected against drug-induced catalepsy.  
537 *Neuroreport* 12, 983-986.

538 Eshraghi, M., Ramirez-Jarquin, U.N., Shahani, N., Nuzzo, T., De Rosa, A., Swarnkar, S., Galli, N.,  
539 Rivera, O., Tsaprailis, G., Scharager-Tapia, C., et al. (2020). RasGRP1 is a causal factor in the  
540 development of l-DOPA-induced dyskinesia in Parkinson's disease. *Sci Adv* 6, eaaz7001.

541 Fernandez-Duenas, V., Gomez-Soler, M., Valle-Leon, M., Watanabe, M., Ferrer, I., and Ciruela,  
542 F. (2019). Revealing Adenosine A2A-Dopamine D2 Receptor Heteromers in Parkinson's  
543 Disease Post-Mortem Brain through a New AlphaScreen-Based Assay. *Int J Mol Sci* 20.

544 Finucane, A.M., Jones, L., Leurent, B., Sampson, E.L., Stone, P., Tookman, A., and Candy, B.  
545 (2020). Drug therapy for delirium in terminally ill adults. *Cochrane Database Syst Rev* 1,  
546 CD004770.

547 Fox, J.H., Connor, T., Chopra, V., Dorsey, K., Kama, J.A., Bleckmann, D., Betschart, C., Hoyer, D.,  
548 Frentzel, S., Difiglia, M., et al. (2010). The mTOR kinase inhibitor Everolimus decreases S6  
549 kinase phosphorylation but fails to reduce mutant huntingtin levels in brain and is not  
550 neuroprotective in the R6/2 mouse model of Huntington's disease. *Mol Neurodegener* 5, 26.

551 Ghiglieri, V., Napolitano, F., Pelosi, B., Schepisi, C., Migliarini, S., Di Maio, A., Pendolino, V.,  
552 Mancini, M., Sciamanna, G., Vitucci, D., et al. (2015). Rhes influences striatal cAMP/PKA-  
553 dependent signaling and synaptic plasticity in a gender-sensitive fashion. *Sci Rep* 5, 10933.

554 Grahn, J.A., Parkinson, J.A., and Owen, A.M. (2008). The cognitive functions of the caudate  
555 nucleus. *Prog Neurobiol* 86, 141-155.

556 Graybiel, A.M., and Grafton, S.T. (2015). The striatum: where skills and habits meet. *Cold*  
557 *Spring Harb Perspect Biol* 7, a021691.

558 Hattori, K., Uchino, S., Isosaka, T., Maekawa, M., Iyo, M., Sato, T., Kohsaka, S., Yagi, T., and  
559 Yuasa, S. (2006). Fyn is required for haloperidol-induced catalepsy in mice. *J Biol Chem* 281,  
560 7129-7135.



561 Herve, D. (2011). Identification of a specific assembly of the g protein golf as a critical and  
562 regulated module of dopamine and adenosine-activated cAMP pathways in the striatum.  
563 *Front Neuroanat* 5, 48.

564 Hoeffler, C.A., and Klann, E. (2010). mTOR signaling: at the crossroads of plasticity, memory  
565 and disease. *Trends Neurosci* 33, 67-75.

566 Jewell, J.L., Fu, V., Hong, A.W., Yu, F.X., Meng, D., Melick, C.H., Wang, H., Lam, W.M., Yuan, H.X.,  
567 Taylor, S.S., et al. (2019). GPCR signaling inhibits mTORC1 via PKA phosphorylation of  
568 Raptor. *Elife* 8.

569 Kim, H.W., Ha, S.H., Lee, M.N., Huston, E., Kim, D.H., Jang, S.K., Suh, P.G., Houslay, M.D., and  
570 Ryu, S.H. (2010). Cyclic AMP controls mTOR through regulation of the dynamic interaction  
571 between Rheb and phosphodiesterase 4D. *Mol Cell Biol* 30, 5406-5420.

572 Klemm, W.R. (1989). Drug effects on active immobility responses: what they tell us about  
573 neurotransmitter systems and motor functions. *Prog Neurobiol* 32, 403-422.

574 Kugler, S., Kilic, E., and Bahr, M. (2003). Human synapsin 1 gene promoter confers highly  
575 neuron-specific long-term transgene expression from an adenoviral vector in the adult rat  
576 brain depending on the transduced area. *Gene Ther* 10, 337-347.

577 Kuroiwa, M., Snyder, G.L., Shuto, T., Fukuda, A., Yanagawa, Y., Benavides, D.R., Nairn, A.C.,  
578 Bibb, J.A., Greengard, P., and Nishi, A. (2012). Phosphodiesterase 4 inhibition enhances the  
579 dopamine D1 receptor/PKA/DARPP-32 signaling cascade in frontal cortex.  
580 *Psychopharmacology (Berl)* 219, 1065-1079.

581 Kurz, M., Hummer, M., Oberbauer, H., and Fleischhacker, W.W. (1995). Extrapyramidal side  
582 effects of clozapine and haloperidol. *Psychopharmacology (Berl)* 118, 52-56.

583 Laplante, M., and Sabatini, D.M. (2012). mTOR signaling in growth control and disease. *Cell*  
584 149, 274-293.

585 Liu, D., Bordicchia, M., Zhang, C., Fang, H., Wei, W., Li, J.L., Guilherme, A., Guntur, K., Czech,  
586 M.P., and Collins, S. (2016). Activation of mTORC1 is essential for beta-adrenergic  
587 stimulation of adipose browning. *J Clin Invest* 126, 1704-1716.

588 Malagelada, C., Jin, Z.H., Jackson-Lewis, V., Przedborski, S., and Greene, L.A. (2010).  
589 Rapamycin protects against neuron death in in vitro and in vivo models of Parkinson's  
590 disease. *J Neurosci* 30, 1166-1175.

591 Morelli, M., and Di Chiara, G. (1985). Catalepsy induced by SCH 23390 in rats. *Eur J Pharmacol*  
592 117, 179-185.

593 Napolitano, F., Bonito-Oliva, A., Federici, M., Carta, M., Errico, F., Magara, S., Martella, G.,  
594 Nistico, R., Centonze, D., Pisani, A., et al. (2010). Role of aberrant striatal dopamine D1  
595 receptor/cAMP/protein kinase A/DARPP32 signaling in the paradoxical calming effect of  
596 amphetamine. *J Neurosci* 30, 11043-11056.

597 Napolitano, F., De Rosa, A., Russo, R., Di Maio, A., Garofalo, M., Federici, M., Migliarini, S.,  
598 Ledonne, A., Rizzo, F.R., Avallone, L., et al. (2019). The striatal-enriched protein Rhes is a  
599 critical modulator of cocaine-induced molecular and behavioral responses. *Sci Rep* 9, 15294.

600 Nishi, A., Kuroiwa, M., and Shuto, T. (2011). Mechanisms for the modulation of dopamine  
601 d(1) receptor signaling in striatal neurons. *Front Neuroanat* 5, 43.

602 Ostinelli, E.G., Brooke-Powney, M.J., Li, X., and Adams, C.E. (2017). Haloperidol for psychosis-  
603 induced aggression or agitation (rapid tranquillisation). *Cochrane Database Syst Rev* 7,  
604 CD009377.

605 Pryor, W.M., Biagioli, M., Shahani, N., Swarnkar, S., Huang, W.C., Page, D.T., MacDonald, M.E.,  
606 and Subramaniam, S. (2014). Huntingtin promotes mTORC1 signaling in the pathogenesis of  
607 Huntington's disease. *Sci Signal* 7, ra103.

608 Radl, D., Chiacchieretta, M., Lewis, R.G., Brami-Cherrier, K., Arcuri, L., and Borrelli, E. (2018).  
609 Differential regulation of striatal motor behavior and related cellular responses by dopamine  
610 D2L and D2S isoforms. *Proc Natl Acad Sci U S A* 115, 198-203.

611 Ravikumar, B., Vacher, C., Berger, Z., Davies, J.E., Luo, S., Oroz, L.G., Scaravilli, F., Easton, D.F.,  
612 Duden, R., O'Kane, C.J., et al. (2004). Inhibition of mTOR induces autophagy and reduces  
613 toxicity of polyglutamine expansions in fly and mouse models of Huntington disease. *Nat*  
614 *Genet* 36, 585-595.

615 Rezai Amin, S., Gruszczynski, C., Guiard, B.P., Callebert, J., Launay, J.M., Louis, F., Betancur, C.,  
616 Vialou, V., and Gautron, S. (2019). Viral vector-mediated Cre recombinase expression in  
617 substantia nigra induces lesions of the nigrostriatal pathway associated with perturbations  
618 of dopamine-related behaviors and hallmarks of programmed cell death. *J Neurochem* 150,  
619 330-340.

620 Roche, K.W., O'Brien, R.J., Mammen, A.L., Bernhardt, J., and Huganir, R.L. (1996).  
621 Characterization of multiple phosphorylation sites on the AMPA receptor GluR1 subunit.  
622 *Neuron* 16, 1179-1188.

623 Rolls, E.T. (1994). Neurophysiology and cognitive functions of the striatum. *Rev Neurol*  
624 (Paris) 150, 648-660.

625 Sarkar, S., Krishna, G., Imarisio, S., Saiki, S., O'Kane, C.J., and Rubinsztein, D.C. (2008). A  
626 rational mechanism for combination treatment of Huntington's disease using lithium and  
627 rapamycin. *Hum Mol Genet* 17, 170-178.

628 Sebel, L.E., Graves, S.M., Chan, C.S., and Surmeier, D.J. (2017). Haloperidol Selectively  
629 Remodels Striatal Indirect Pathway Circuits. *Neuropsychopharmacology* 42, 963-973.

630 Shahani, N., Huang, W.C., Varnum, M., Page, D.T., and Subramaniam, S. (2017). Forebrain  
631 depletion of Rheb GTPase elicits spatial memory deficits in mice. *Neurobiol Aging* 50, 134-  
632 143.

633 Shahani, N., Pryor, W., Swarnkar, S., Kholodilov, N., Thinakaran, G., Burke, R.E., and  
634 Subramaniam, S. (2014). Rheb GTPase regulates beta-secretase levels and amyloid beta  
635 generation. *J Biol Chem* 289, 5799-5808.

636 Shahani, N., Swarnkar, S., Giovinazzo, V., Morgenweck, J., Bohn, L.M., Scharager-Tapia, C.,  
637 Pascal, B., Martinez-Acedo, P., Khare, K., and Subramaniam, S. (2016). RasGRP1 promotes  
638 amphetamine-induced motor behavior through a Rhes interaction network ("Rhesactome")  
639 in the striatum. *Sci Signal* 9, ra111.

640 Sheng, M.J., Lu, D., Shen, Z.M., and Poo, M.M. (2019). Emergence of stable striatal D1R and  
641 D2R neuronal ensembles with distinct firing sequence during motor learning. *Proc Natl Acad*  
642 *Sci U S A* 116, 11038-11047.

643 Stallone, G., Infante, B., Prisciandaro, C., and Grandaliano, G. (2019). mTOR and Aging: An Old  
644 Fashioned Dress. *Int J Mol Sci* 20.

645 Swarnkar, S., Chen, Y., Pryor, W.M., Shahani, N., Page, D.T., and Subramaniam, S. (2015).  
646 Ectopic expression of the striatal-enriched GTPase Rhes elicits cerebellar degeneration and  
647 an ataxia phenotype in Huntington's disease. *Neurobiol Dis* 82, 66-77.

648 Troca-Marin, J.A., Alves-Sampaio, A., and Montesinos, M.L. (2012). Deregulated mTOR-  
649 mediated translation in intellectual disability. *Prog Neurobiol* 96, 268-282.

650 Usiello, A., Baik, J.H., Rouge-Pont, F., Picetti, R., Dierich, A., LeMeur, M., Piazza, P.V., and  
651 Borrelli, E. (2000). Distinct functions of the two isoforms of dopamine D2 receptors. *Nature*  
652 *408*, 199-203.

653 Valjent, E., Bertran-Gonzalez, J., Bowling, H., Lopez, S., Santini, E., Matamales, M., Bonito-Oliva,  
654 A., Herve, D., Hoeffler, C., Klann, E., et al. (2011). Haloperidol regulates the state of  
655 phosphorylation of ribosomal protein S6 via activation of PKA and phosphorylation of  
656 DARPP-32. *Neuropsychopharmacology* *36*, 2561-2570.

657 Vitucci, D., Di Giorgio, A., Napolitano, F., Pelosi, B., Blasi, G., Errico, F., Attrotto, M.T., Gelao, B.,  
658 Fazio, L., Taurisano, P., et al. (2016). Rasd2 Modulates Prefronto-Striatal Phenotypes in  
659 Humans and 'Schizophrenia-Like Behaviors' in Mice. *Neuropsychopharmacology* *41*, 916-  
660 927.

661 Wang, Y., Yamada, E., Zong, H., and Pessin, J.E. (2015). Fyn Activation of mTORC1 Stimulates  
662 the IRE1alpha-JNK Pathway, Leading to Cell Death. *J Biol Chem* *290*, 24772-24783.

663 Zeng, L.H., Rensing, N.R., and Wong, M. (2009). The mammalian target of rapamycin signaling  
664 pathway mediates epileptogenesis in a model of temporal lobe epilepsy. *J Neurosci* *29*, 6964-  
665 6972.

666

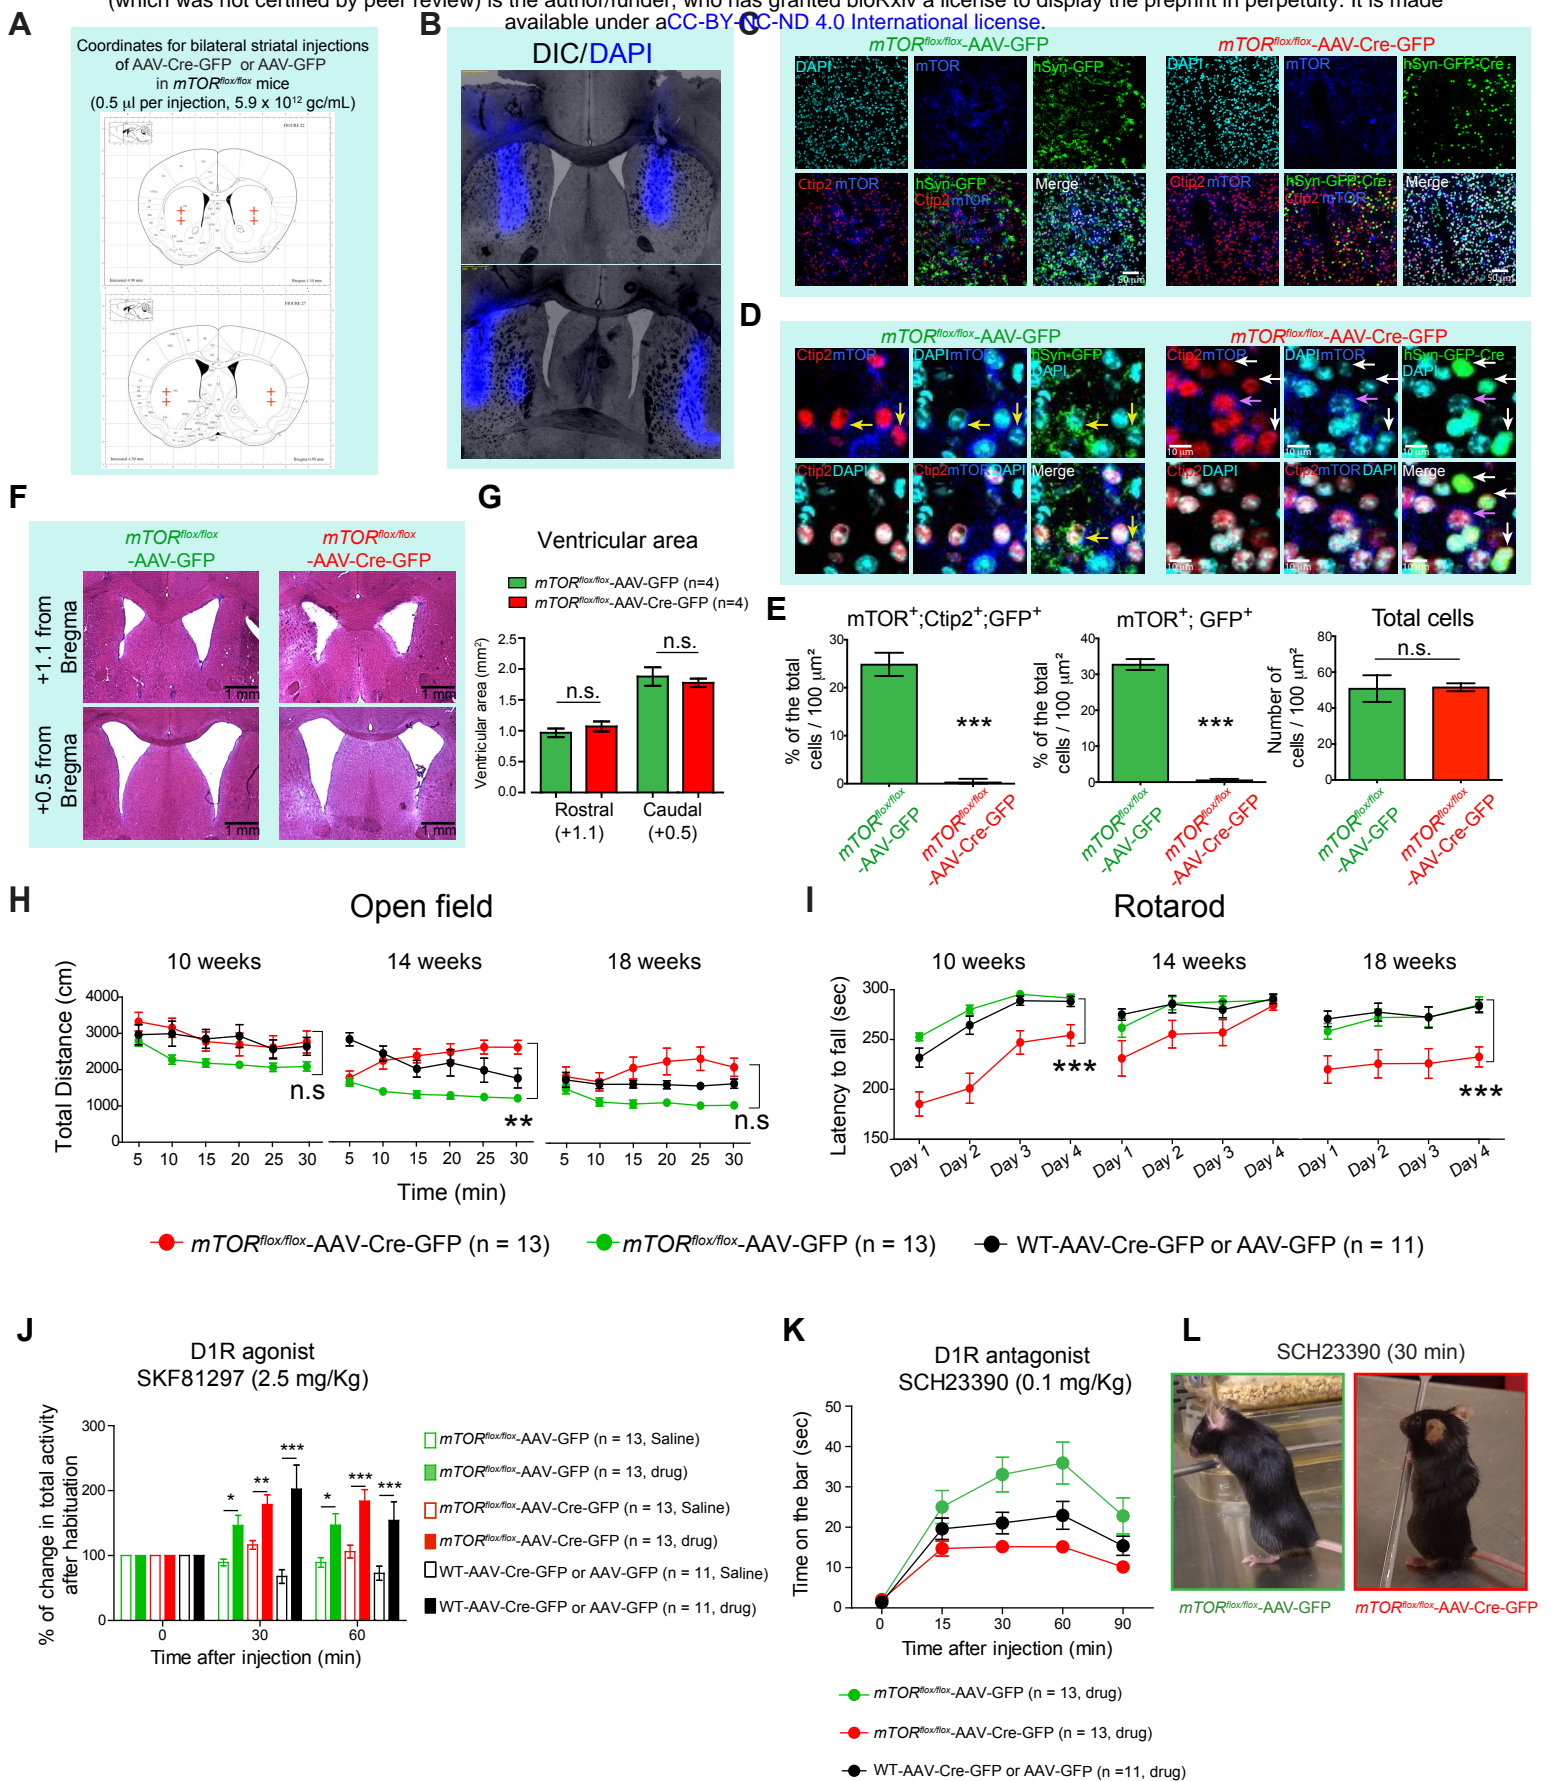

Figure 1

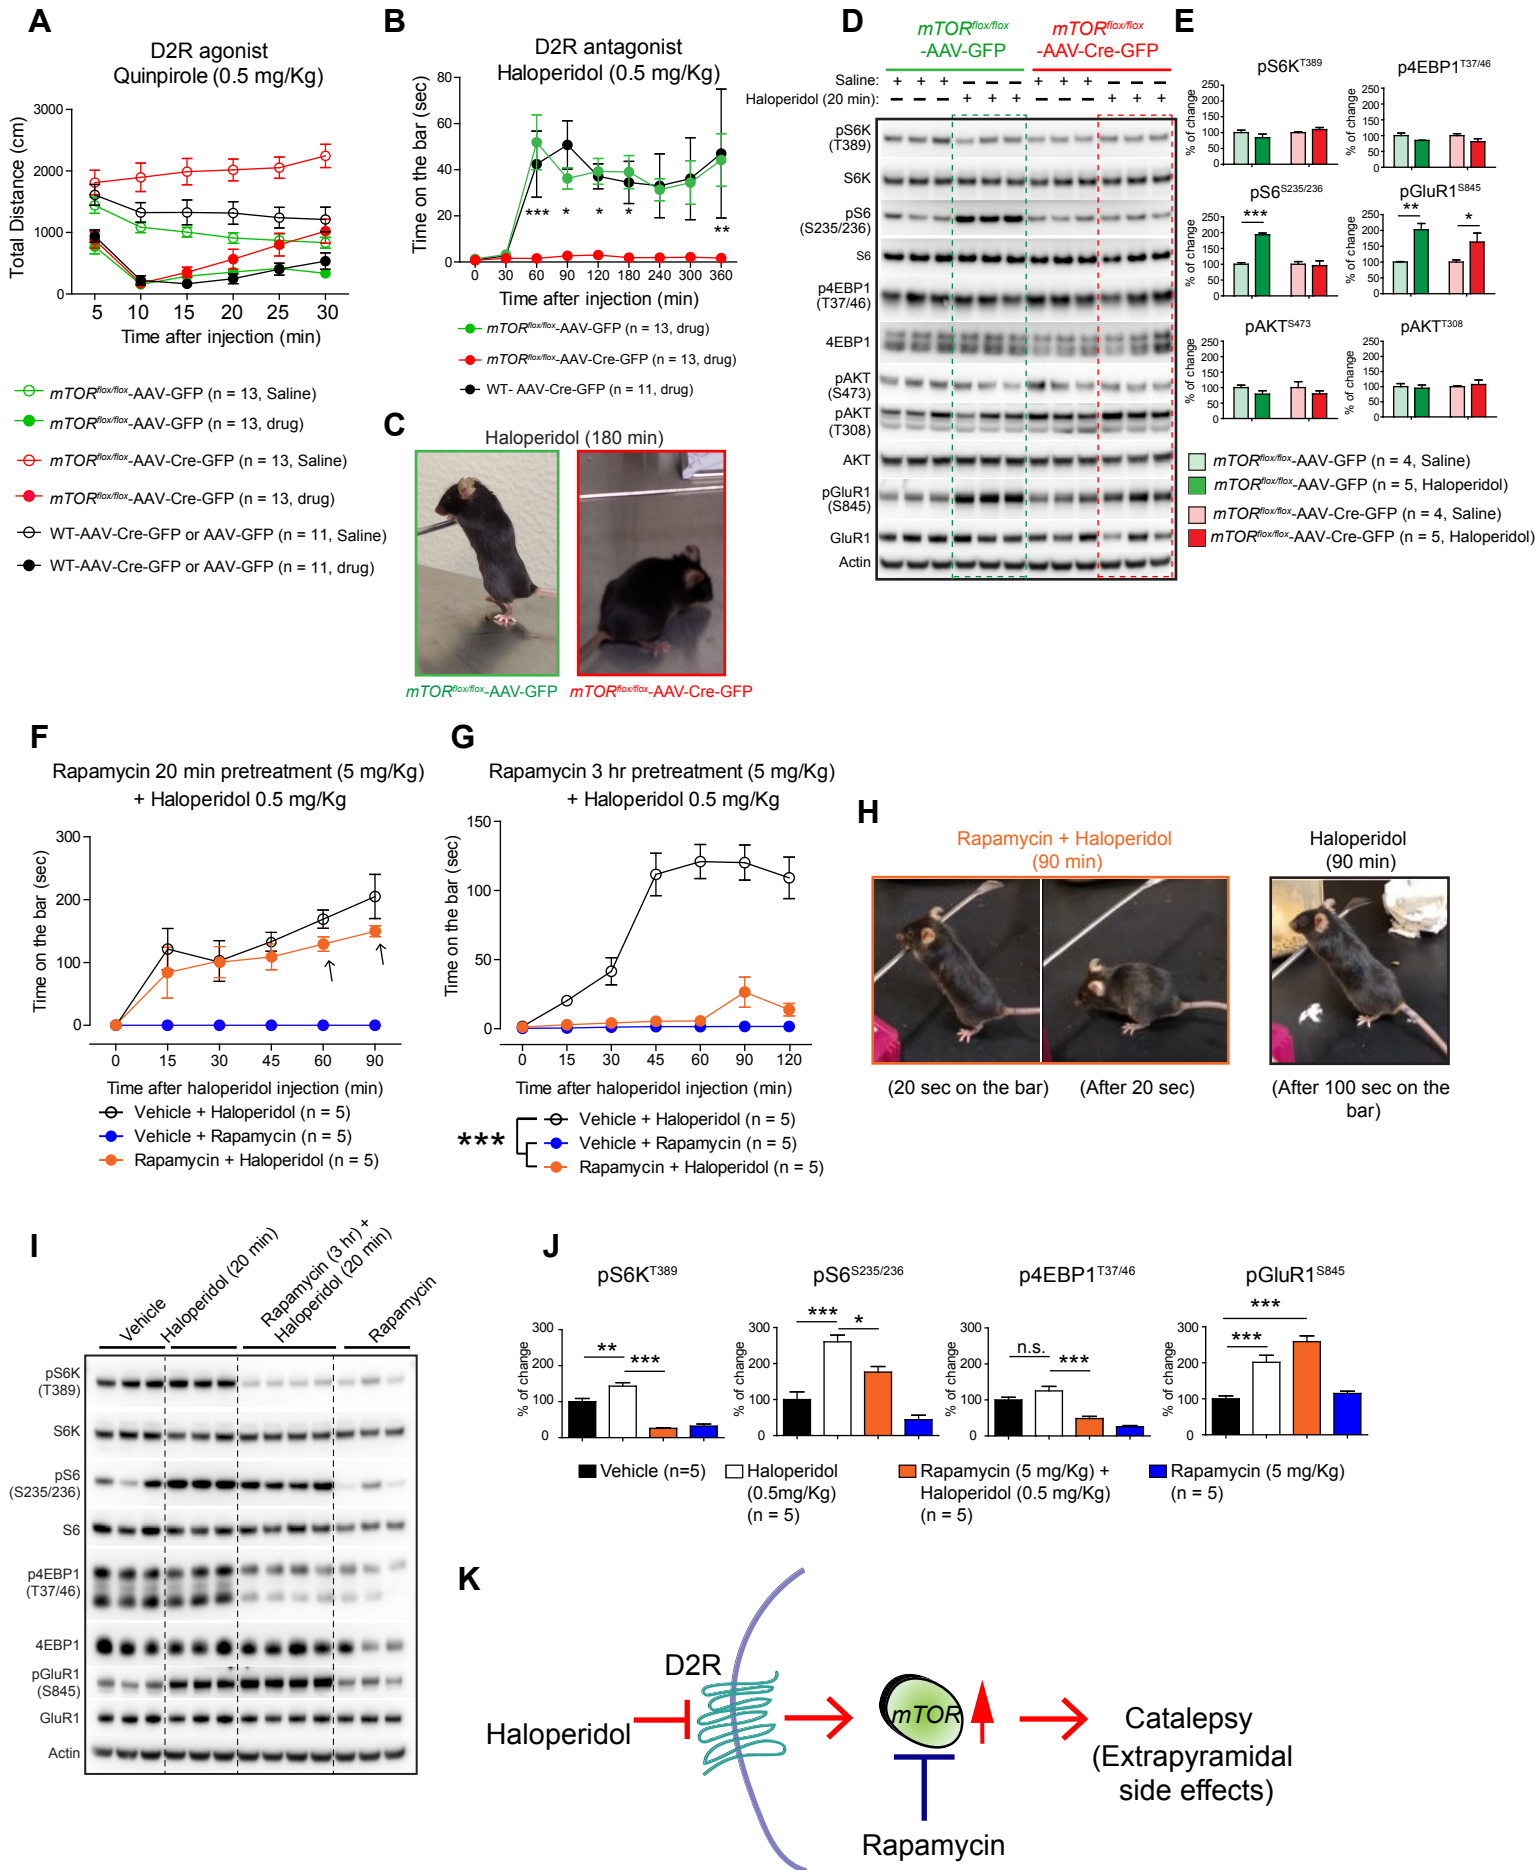

Figure 2

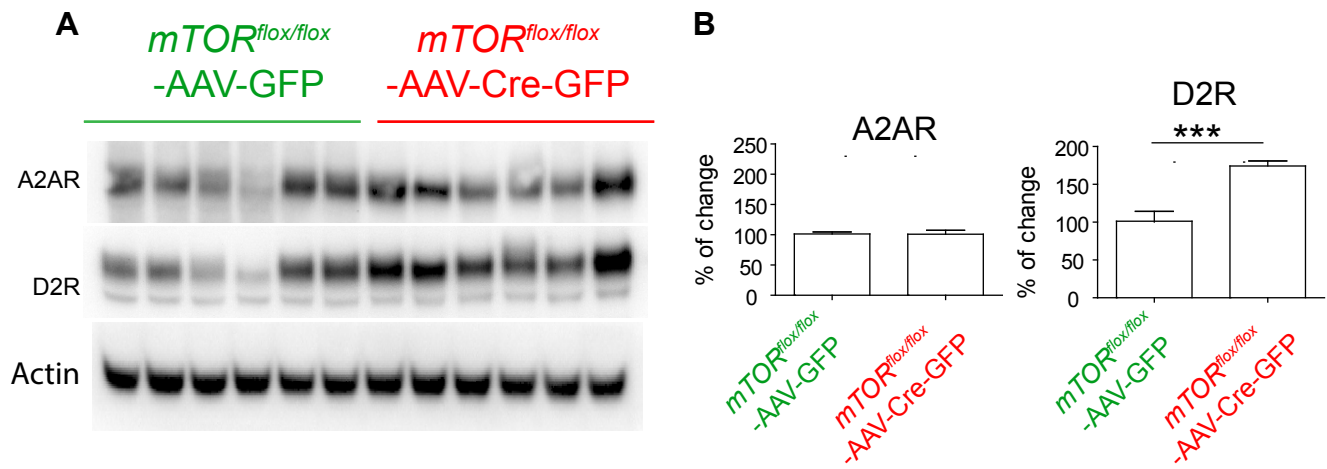

Supplementary Figure 1
